# Supplementary material for: Heteroleptic metal alkoxide “oxoclusters” as molecular models for the sol–gel synthesis of perovskite nanoparticles for bio-imaging applications
Source: Royal Society of Chemistry journal article supplement (doi:10.1039/b801351a), 2008-01-01
Supplement: b801351a.pdf [file b801351a.pdf]

## Supplementary information for b801351a

### Technical files:

Final statistics for integration protocols, Comp1.ls to Comp8.ls

### Figures:

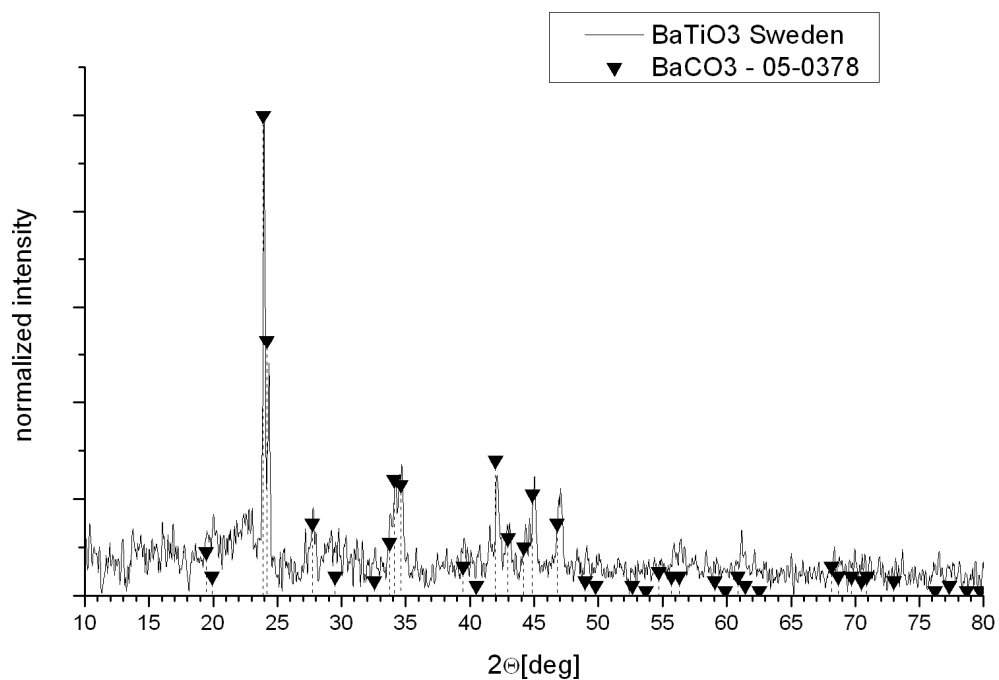

Fig. FS-1 X-ray powder pattern of the 1M solution of

$(\text{Ba}_{1-x}\text{Eu}_x)_2\text{Ti}_2(\text{thd})_4(\text{O}^n\text{Pr})_{8+x}(\text{}^n\text{PrOH})_{2-x}$ , in  ${}^n\text{PrOH}$  immersed into boiling water

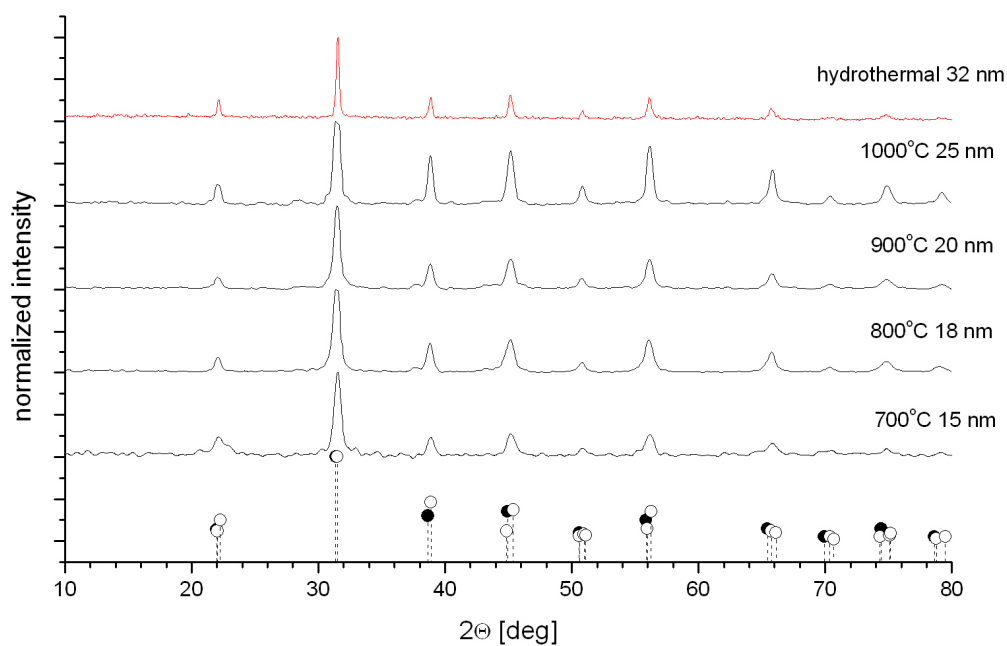

Fig. FS-2 X-ray powder patterns of Nanoparticles heat-treated at different temperatures and average particle size calculated using Sherrer equation

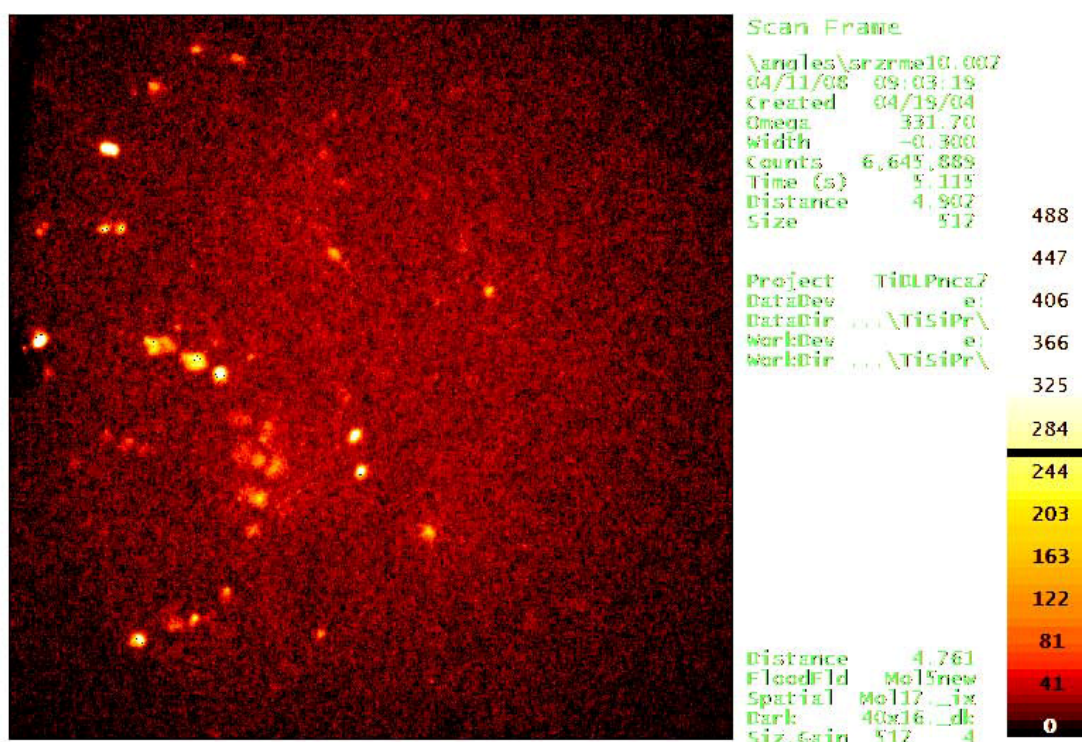

SLU - Kemi - 04/11/08

Fig. FS-3 Typical diffraction frame Compound 2

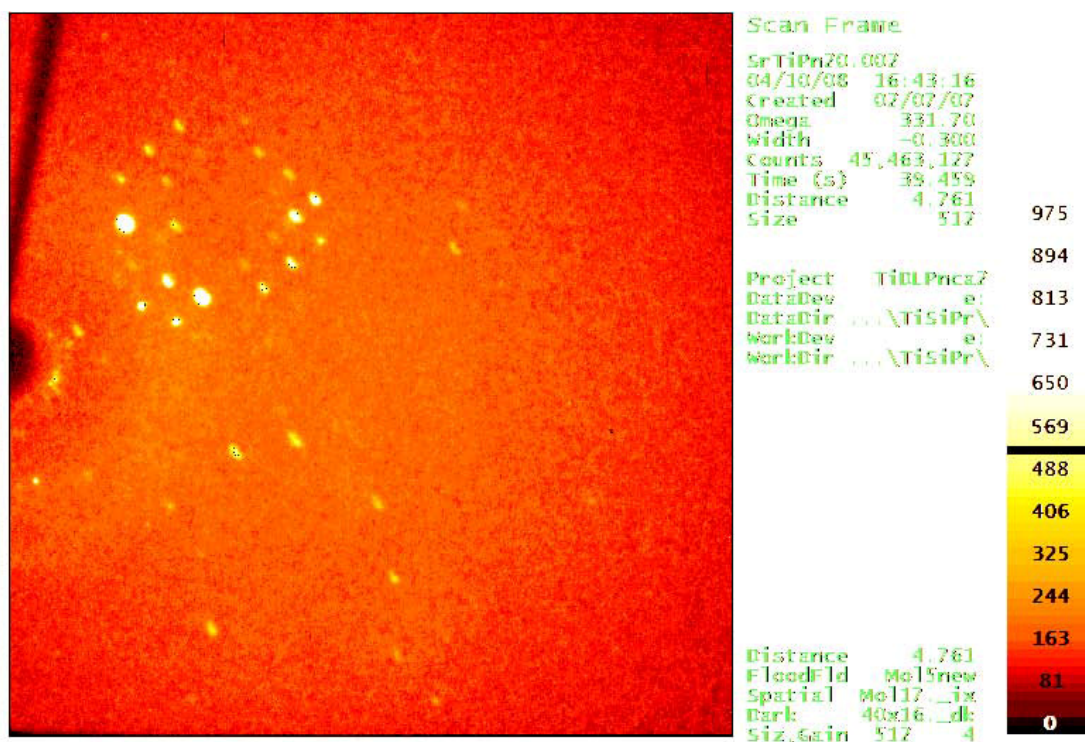

SLU - Kemi - 04/10/08

Fig. FS-4 Typical diffraction frame Compound 3

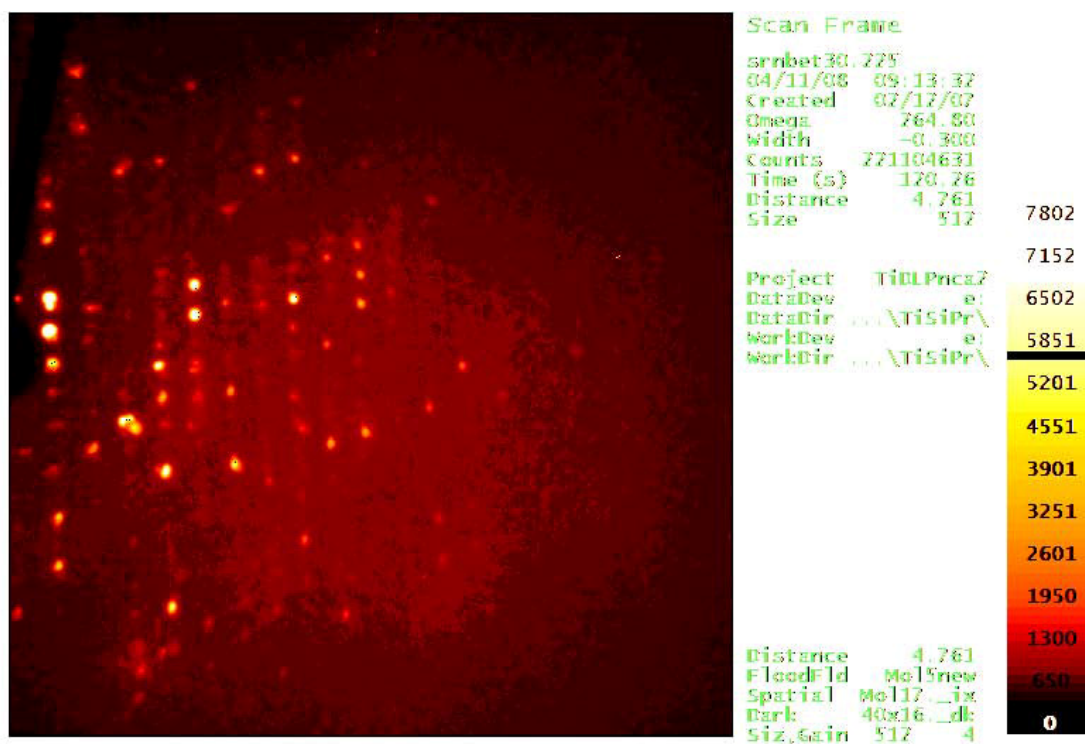

SLU - Kemi - 04/11/08

Fig. FS-5 Typical diffraction frame Compound 4

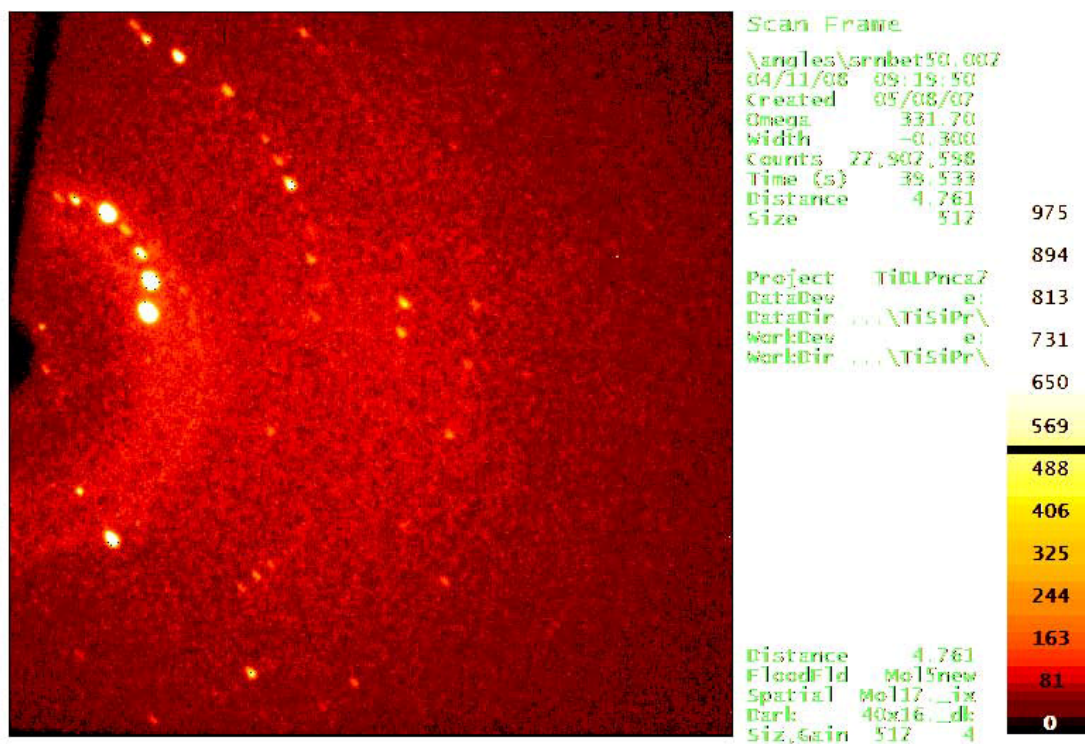

SLU - Kemi - 04/11/08

Fig. FS-6 Typical diffraction frame Compound 5

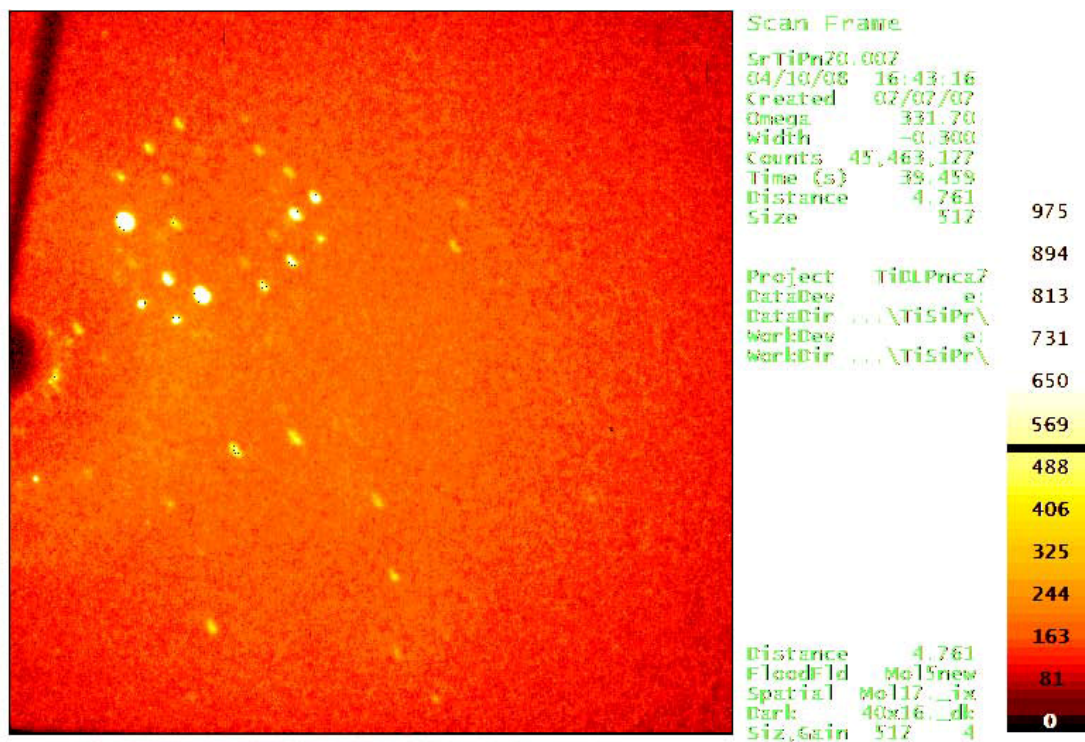

SLU - Kemi - 04/10/08

Fig. FS-7 Typical diffraction frame Compound 6

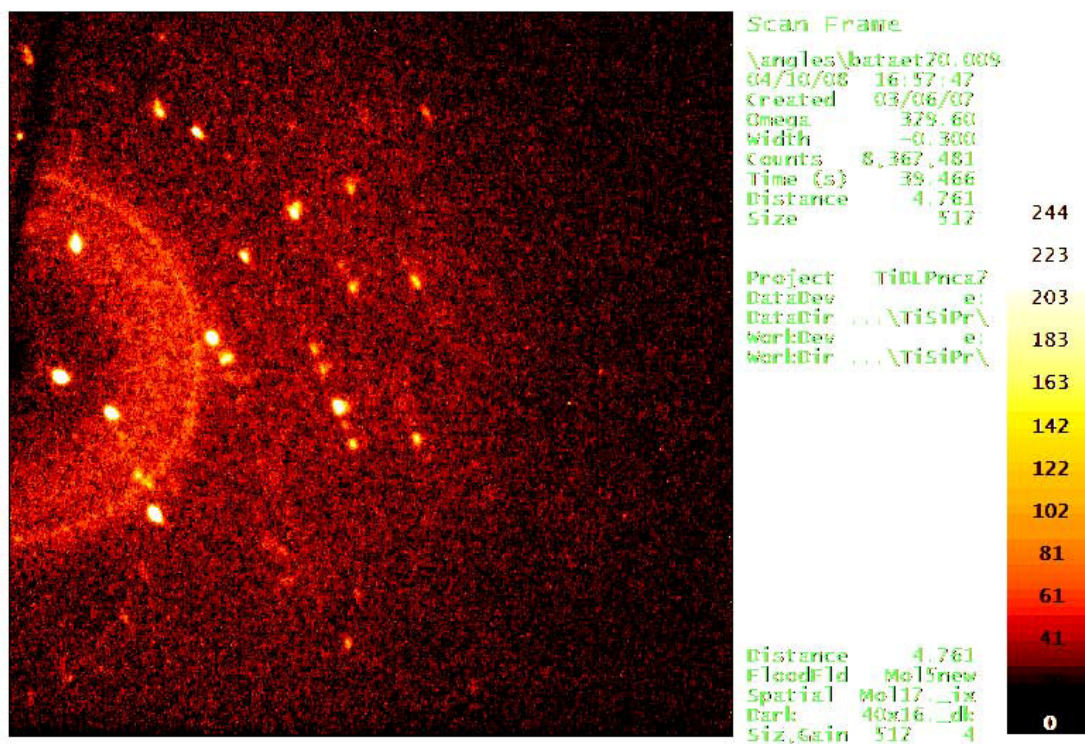

SLU - Kemi - 04/10/08

Fig. FS-8 Typical diffraction frame Compound 7

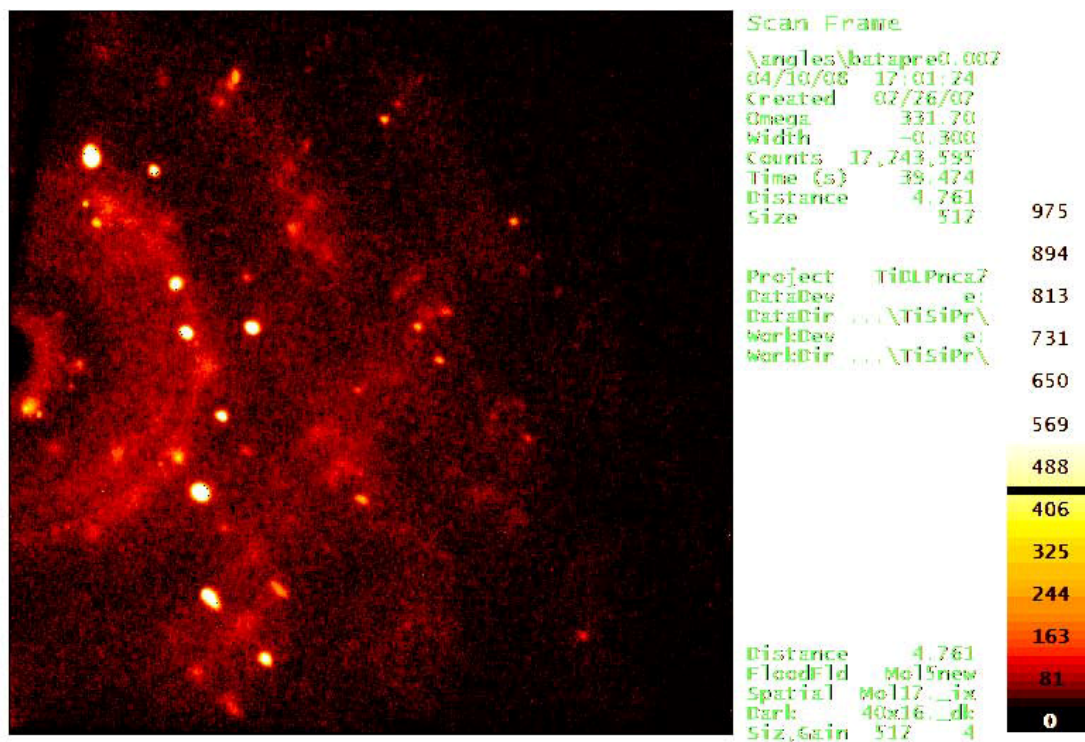

SLU - Kemi - 04/10/08

Fig. FS-9 Typical diffraction frame Compound 8
